# Supplementary material for: Different NIPBL requirements of cohesin-STAG1 and cohesin-STAG2
Source: PubMed Central journal article supplement (PMC10006224; doi:10.1038/s41467-023-36900-7), 2023-03-10
Supplement: 41467_2023_36900_MOESM1_ESM.pdf [file 41467_2023_36900_MOESM1_ESM.pdf]

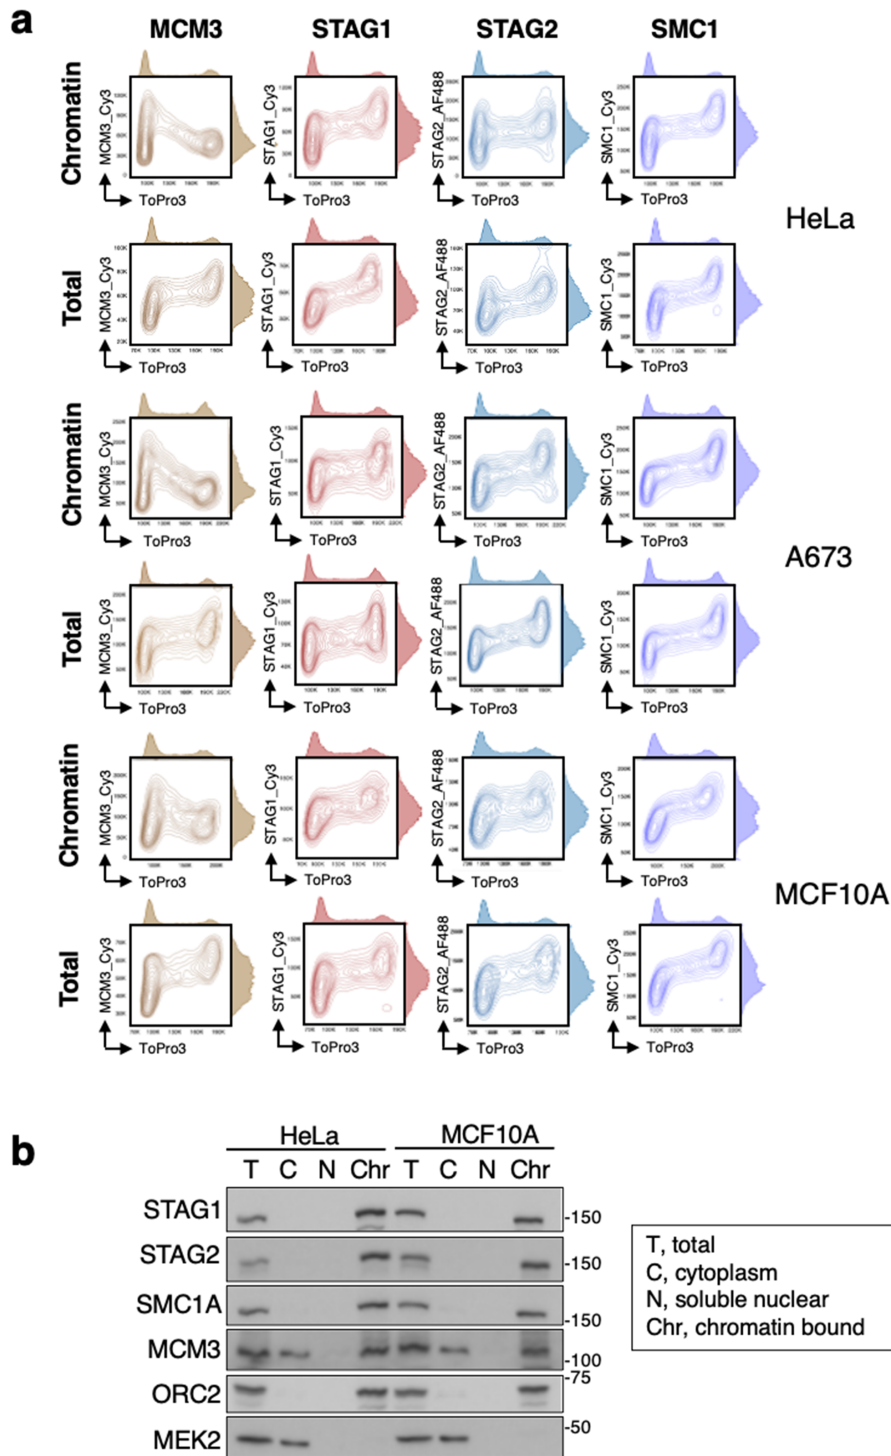

**Supplementary Fig. 1 Chromatin association of the two cohesin variants by flow cytometry.** **a** Flow cytometry analysis of asynchronously growing HeLa, Ewing sarcoma A673 and mammary epithelial MCF10A cells with the indicated antibodies. Results are shown as contour plots. Cells were either pre-extracted with detergent before fixation to measure chromatin-bound protein levels (Chromatin) or permeabilized after fixation to assess total levels in the cell (Total). For each map, the cell cycle profile according to DNA content appears on top while the distribution of antibody intensities is plotted on the right. **b** Immunoblot analysis of the indicated cellular fractions from HeLa and MCF10A cells. ORC2, a chromatin bound protein, and MEK2, a cytoplasmic kinase, were used as controls for the fractionation procedure. This is a single experiment.

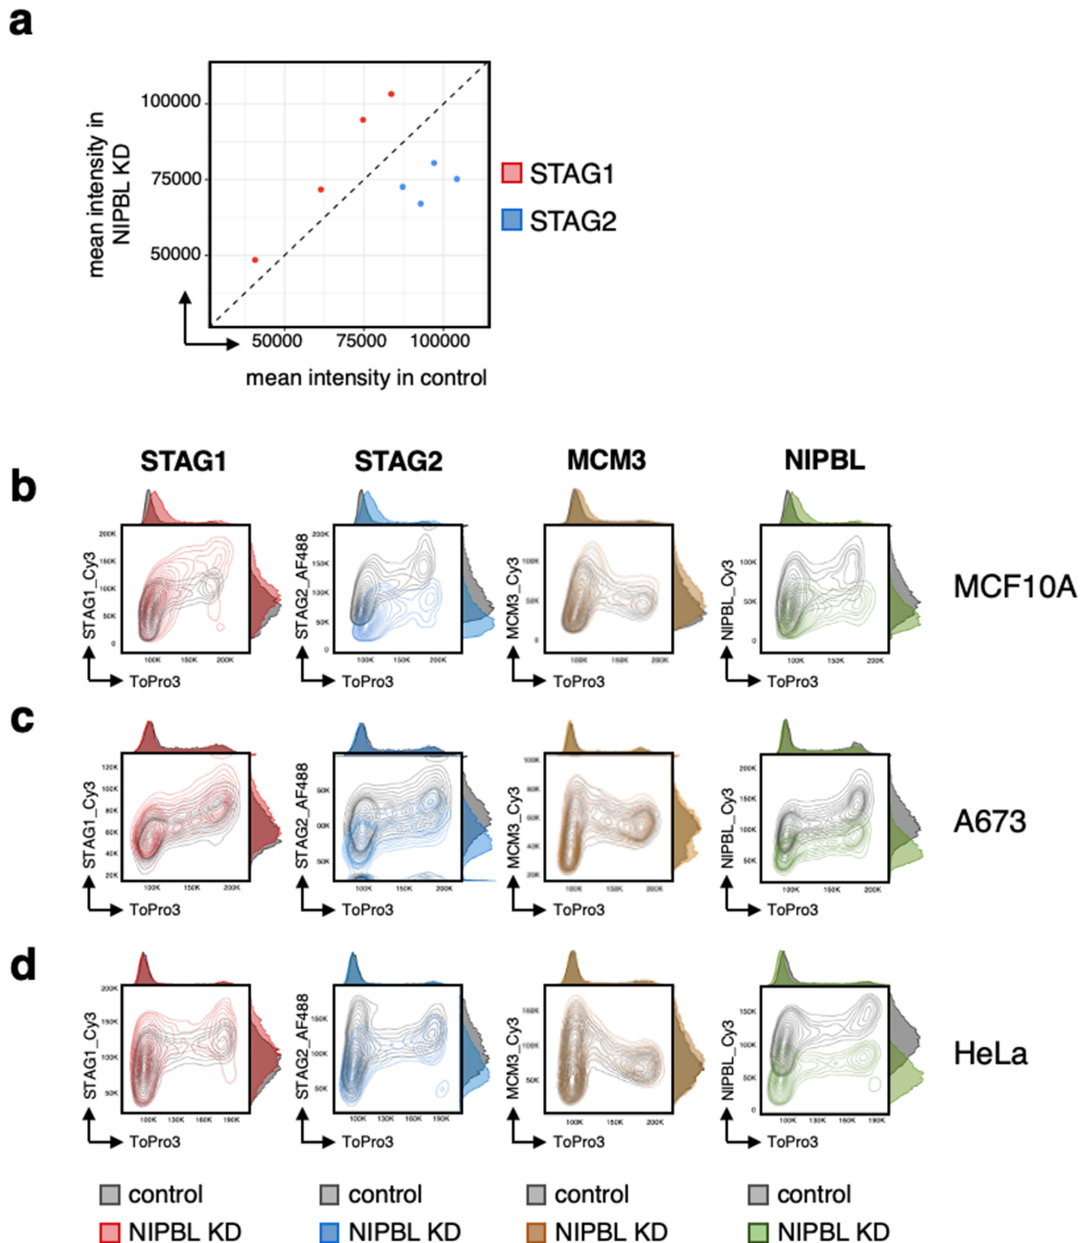

**Supplementary Fig. 2 NIPBL KD affects cohesin-STAG1 and cohesin-STAG2 in opposite ways also in MCF10A and A673 cells.** **a** Mean intensity values for STAG1 and STAG2 in control and NIPBL KD HeLa cells (n=4 experiments). The plot shows an increase in STAG1 signal and a decrease in STAG2 signal upon NIPBL KD, both statistically significant (p-values: 0.02 and 0.008686, respectively, using paired two-sided Student t Test). **b-d** Flow cytometry contour plots for chromatin-bound levels of the indicated proteins in control (grey plots) and NIPBL KD (colored plots) in MCF10A cells (b), A673 cells (c) and HeLa cells (d). In the latter experiment, a mixture of 4 siRNAs (smart pool) was used.

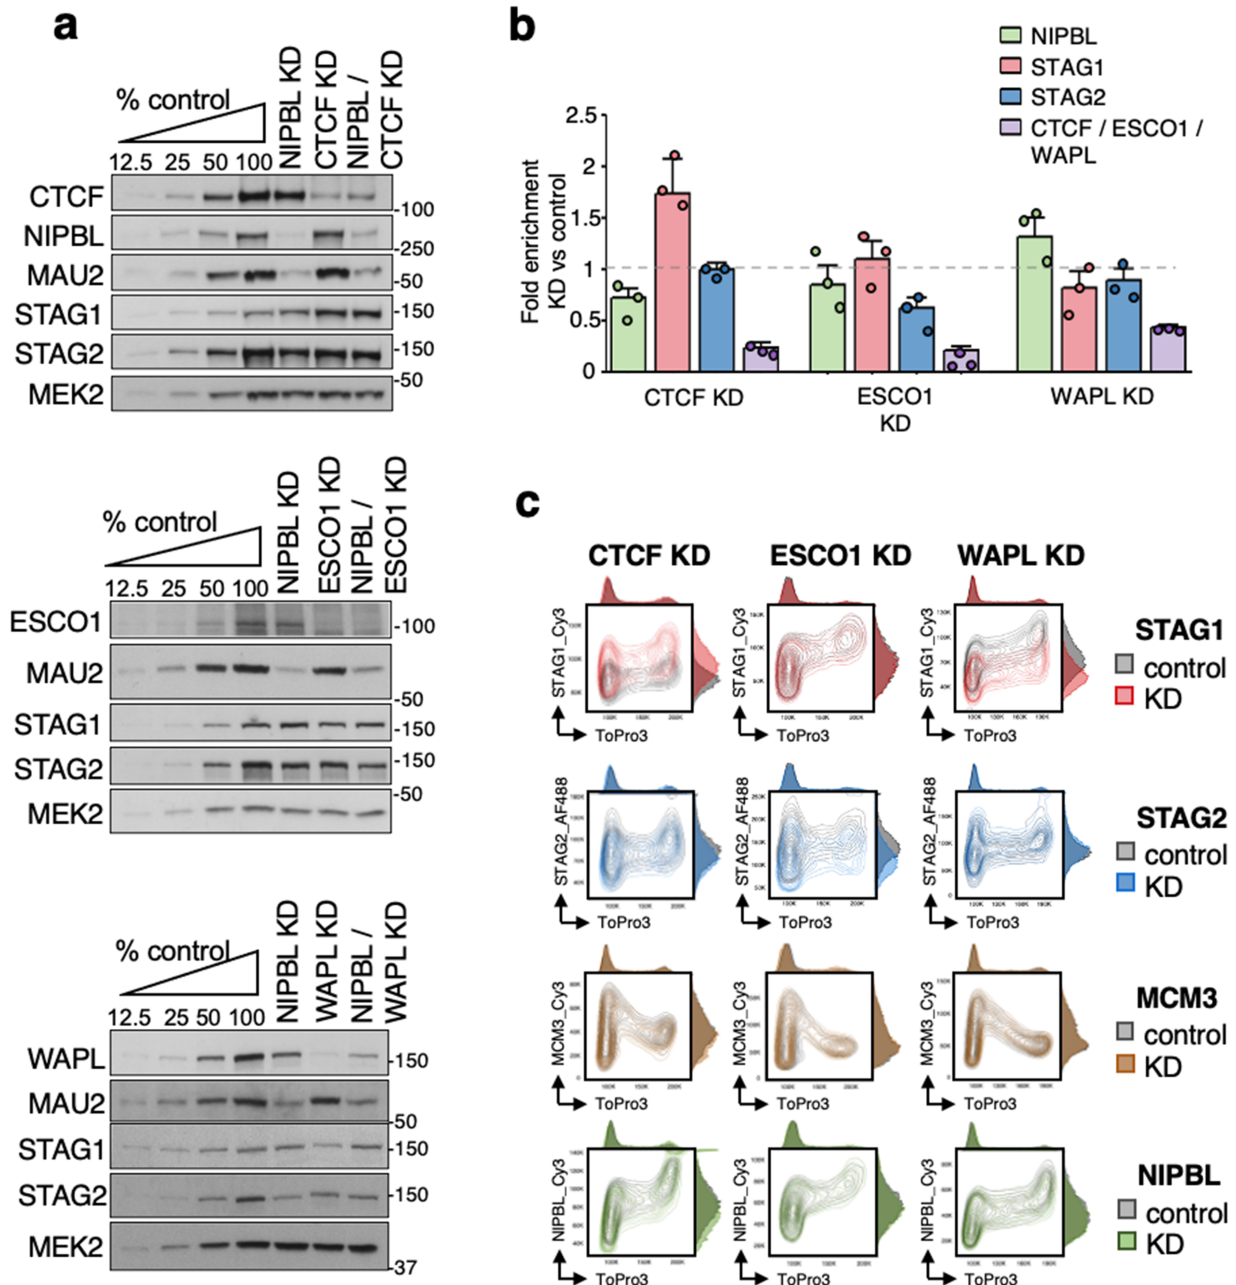

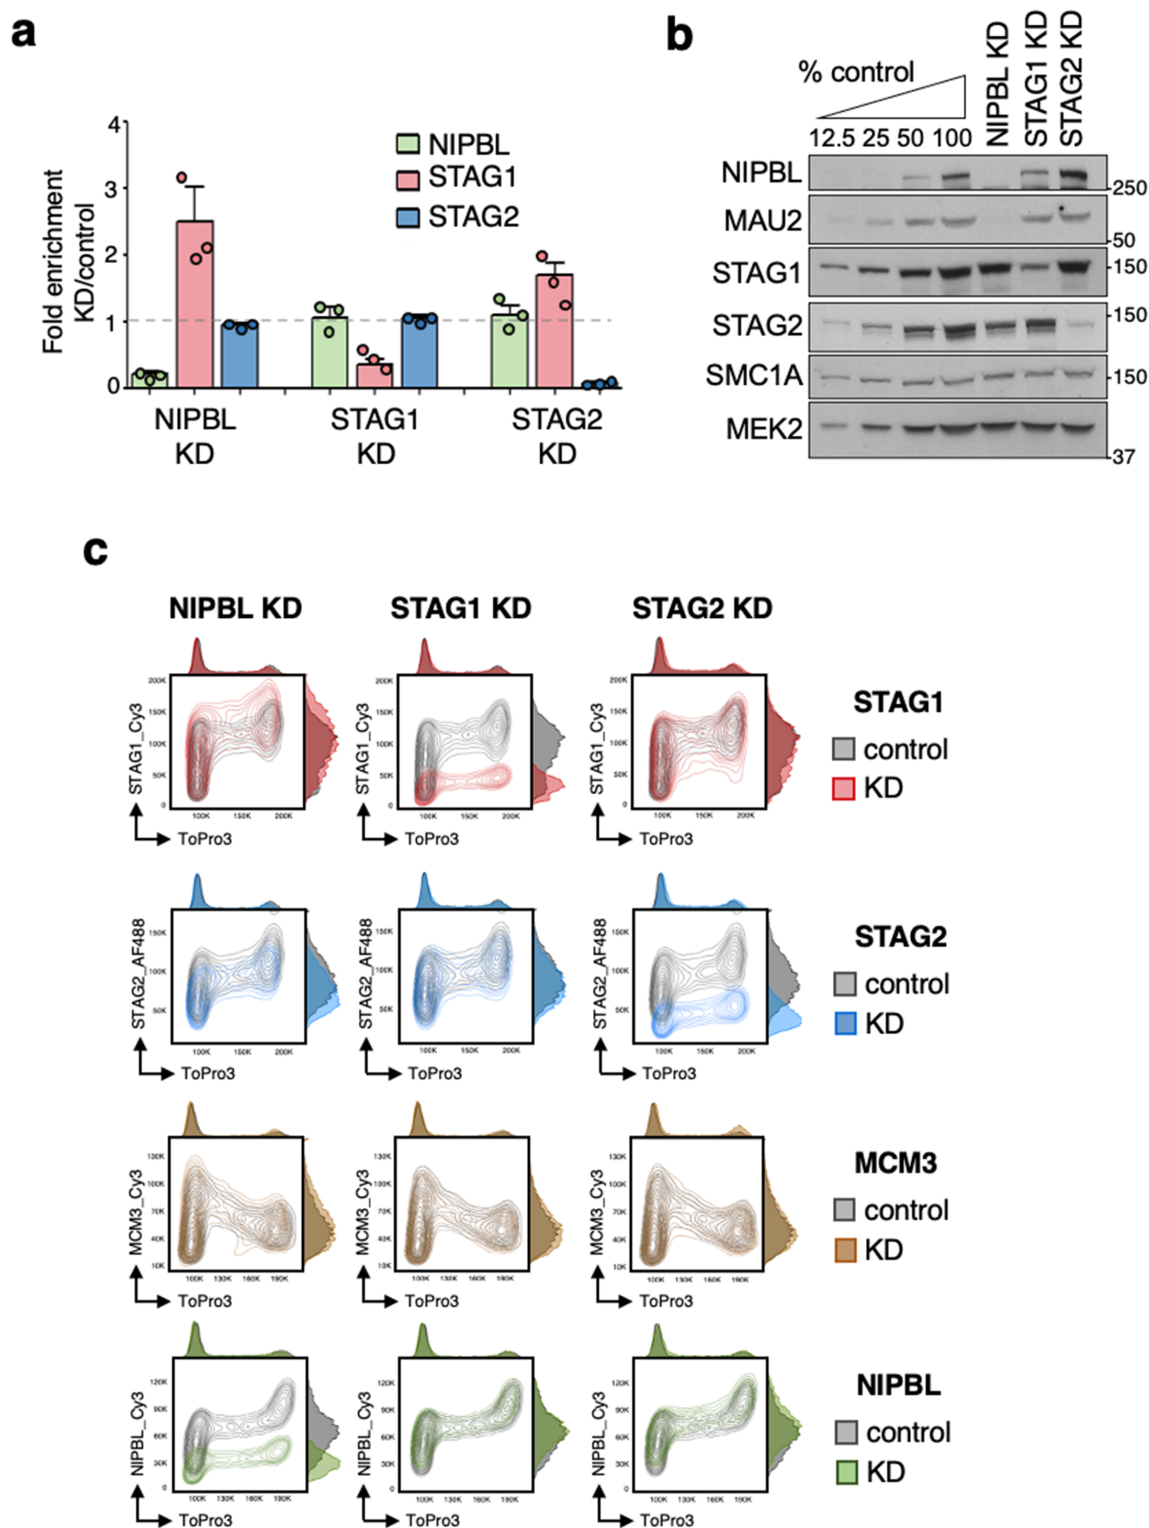

**Supplementary Fig. 4 STAG1 behavior is not the same in NIPBL KD and STAG2 KD cells.** **a** Quantification of mRNA levels of STAG1, STAG2 and NIPBL in the indicated KD cells expressed as fold change compared to their respective controls and normalized to GAPDH. Data from 3 experiments are represented as mean values  $\pm$ SEM. **b** Immunoblot analyses of total cell extracts from control and KD HeLa cells. **c** Flow cytometry contour plots for the indicated chromatin-bound proteins in control cells (grey plots) and cells KD for NIPBL, STAG1 or STAG2 (colored) were overlapped for comparison. For b and c, a representative experiment out of the 3 performed is shown.



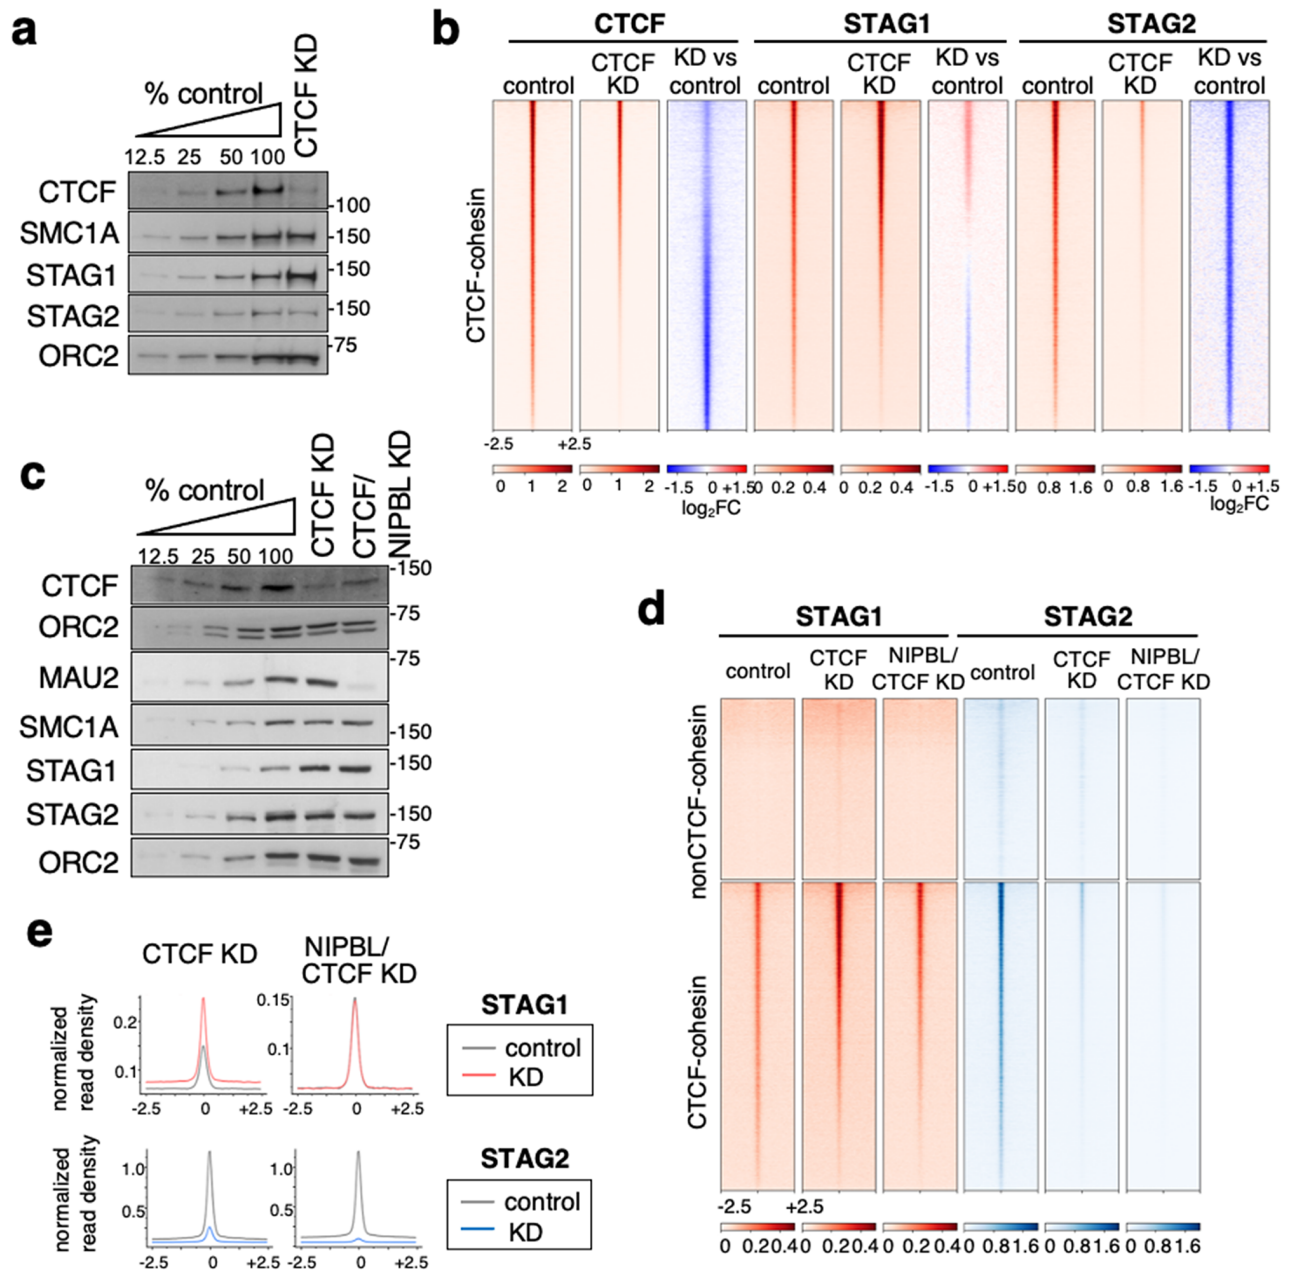

**Supplementary Fig. 5 Cohesin-STAG1 persists at CTCF sites after reduction of CTCF and NIPBL levels.** **a** Immunoblot analysis of CTCF KD cells used for ChIP-seq shown in Fig. 4c. Replicates are shown in c and Supplementary Fig. 3a. **b** Heatmap showing log<sub>2</sub> fold change (log<sub>2</sub>FC) in CTCF KD versus control at CTCF-cohesin positions for CTCF, STAG1 and STAG2 ChIP signals. **c** Immunoblot analyses of cells used for ChIP-seq shown in d. **d** Heatmaps showing genome-wide distribution of STAG1 and STAG2 in MCF10A cells control, CTCF KD and double CTCF/NIPBL KD conditions. Reads from calibrated ChIP-seq are plotted in a 5-kb window centered in the summits of cohesin positions with and without CTCF. A single replicate for each condition is plotted. **e** Normalized read density plots for cohesin subunits  $\pm 2.5$  kb of the summit in the different KD conditions.

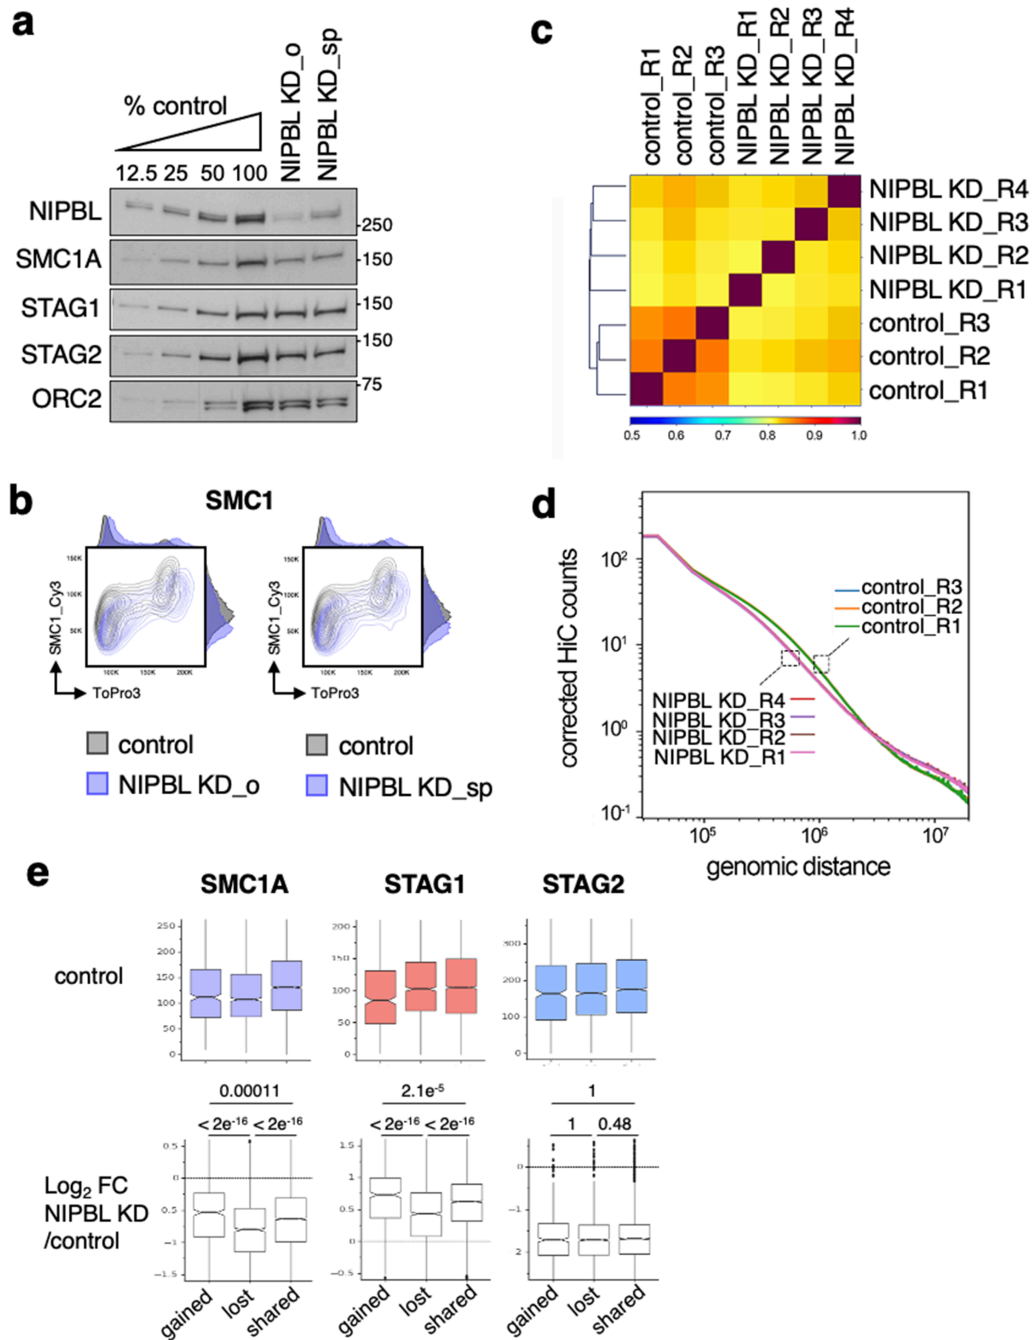

**Supplementary Fig. 6 Correlation among Hi-C replicates and additional analyses. a** Immunoblot analysis of the NIPBL KD cells used for in situ Hi-C. Cells were transfected with a single oligonucleotide (NIPBL KD\_o) or with a smart pool of four oligonucleotides (NIPBL KD\_sp). This is a single experiment. **b** Contour plots showing chromatin-bound SMC1A levels in NIPBL KD and control cells used in in situ Hi-C. **c** Hierarchical clustering of Hi-C data showing correlation among the replicates for the control (3) and NIPBL KD (4) conditions. **d** Contact probability as a function of genome distance in replicates of control and NIPBL KD cells. **e** Boxplots showing occupancy of the indicated proteins (SMC1A, STAG1, STAG2) in control cells at loop anchors for gained (406), lost (1029) and shared loops (2666) between control and NIPBL KD cells (colored plots), and the log<sub>2</sub> fold change of this occupancy (uncolored plots). Boxes represent interquartile range (IQR); the midline represents the median; whiskers are 1.5 x IQR; and individual points are outliers. Statistical significance was calculated using a non-parametric Mann Whitney two-sided test with Holm's correction for multiple comparisons.

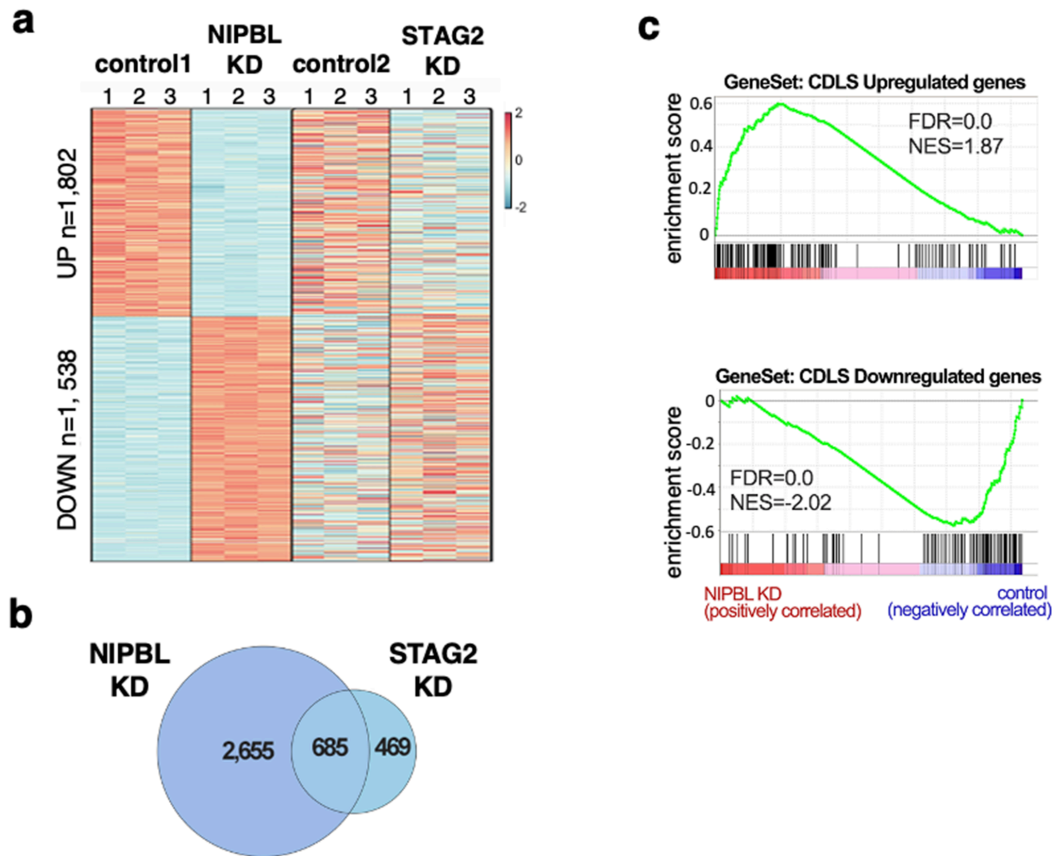

**Supplementary Fig. 7 Gene deregulation in NIPBL KD cells resembling Cornelia de Lange Syndrome.** **a** Heatmap of significant gene expression changes ( $FDR < 0.05$ ,  $|\log_2FC| > 0.5$ ) between MCF10A cells in control and NIPBL KD condition (3 replicates each) and comparison with the changes detected in STAG2 KD cells. **b** Venn diagram showing Differentially Expressed Genes (DEGs) in the two KD conditions. See Supplementary Data 2 and 3 for gene lists. **c** GSEA was used to compare gene deregulation in NIPBL KD and STAG2 KD in MCF10A cells with that observed in lymphocyte cell lines from CdLS patients carrying mutations in NIPBL (see Supplementary Data 4 for genes in each geneset). Only NIPBL KD deregulated genes showed significant enrichment in gene sets encompassing CdLS upregulated (top) and downregulated (bottom) genes.

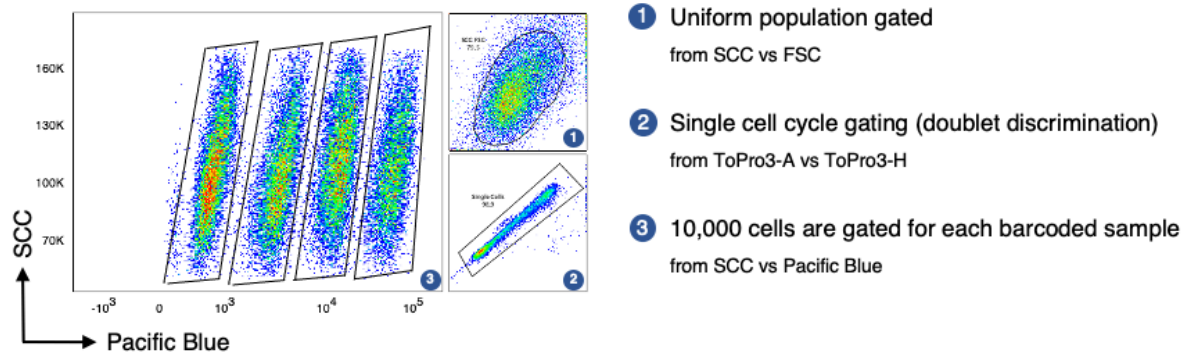

**Supplementary Fig. 8. Gating strategy for flow cytometry analyses.** The following steps were followed. First, the whole barcoded sample is gated by plotting forward scatter (FSC) versus side scatter (SSC), which measure cell size and granularity/complexity, respectively, in order to exclude cell debris and ensure a uniform population. Second, DNA content is plotted to gate single cells and avoid cell aggregates. Finally, the four barcoded populations stained with increasing concentrations of dye are separated by plotting SCC versus Pacific Blue. Each population is gated and 10,000 cells are exported for subsequent analysis.

**Supplementary Table 1. Changes in cohesin subunit abundance on chromatin after NIPBL KD measured by immunofluorescence (related to Fig. 1c)**

HeLa cells pre-extracted with detergent before fixation were stained with cohesin antibodies. Changes in staining intensity in NIPBL KD compared to control cells are expressed as percentage. Statistical significance was calculated with a non-parametric Mann Whitney two-sided test with confidence intervals of 99%

| staining     | condition | Mean intensity | SD    | n° cells | % change | p value |
|--------------|-----------|----------------|-------|----------|----------|---------|
| <b>SMC1</b>  | control   | 103.93         | 15.06 | 372      | 83%      | <2E-16  |
|              | NIPBL KD  | 85.86          | 18.76 | 378      |          |         |
| <b>STAG1</b> | control   | 62.36          | 15.64 | 419      | 129%     | <2E-16  |
|              | NIPBL KD  | 80.34          | 25.19 | 559      |          |         |
| <b>STAG2</b> | control   | 65.80          | 17.66 | 419      | 77%      | < 2E-16 |
|              | NIPBL KD  | 51.10          | 12.04 | 559      |          |         |

**Supplementary Table 2. STAG1 upregulation in NIPBL deficient cells**

| Cell*_condition           | Log2FC | FDR      | ref        |
|---------------------------|--------|----------|------------|
| LCLs_CdLS                 | 1.16   | 0.02     | [1]        |
| MCF10A_siNIPBL            | 2.01   | 3.6E-200 | this study |
| HAP1_MAU2 KO              | 0.68   | 0.0008   | [2]        |
| P19_siNIPBL               | 0.52   | 7.8E-8   | [3]        |
| Hepatocytes_Nipbl KO      | 1.01   | 0.02     | [4]        |
| Embryonic brain_Nipbl +/- | 0.21   | 0.005    | [5]        |
| MEFs_Nipbl +/-            | 0.53   | 0.009    | [5]        |

\*LCL, lymphoblastoid cell lines; MEF, mouse embryo fibroblasts



**Supplementary Table 3. Differential peaks called in control and NIPBL KD cells (related to Figure 4a)**

| antibody_condition | FDR< 0.05   |              |                       | FDR <0.01   |              |                       |
|--------------------|-------------|--------------|-----------------------|-------------|--------------|-----------------------|
|                    | peak number | common peaks | % peaks KD vs control | peak number | common peaks | % peaks KD vs control |
| SMC1A_control      | 35,171      | 12,742       | 45.3%                 | 30,305      | 9,100        | 34.9%                 |
| SMC1A_NIPBL KD     | 15,945      |              |                       | 10,574      |              |                       |
| STAG1_control      | 26,355      | 22,524       | 110.9%                | 22,849      | 19,872       | 110.1%                |
| STAG1_NIPBL KD     | 29,232      |              |                       | 25,167      |              |                       |
| STAG2_control      | 55,059      | 7,852        | 15.3%                 | 46,577      | 5,936        | 13.4%                 |
| STAG2_NIPBL KD     | 8,413       |              |                       | 6,247       |              |                       |

**Supplementary Table 4. Datasets used in this study**

| Type of data               | Sample Name               | Unique reads aligned to human (mill) | GEO accession          | URL                                                                                                                                     | Source                                                                                                                                  |
|----------------------------|---------------------------|--------------------------------------|------------------------|-----------------------------------------------------------------------------------------------------------------------------------------|-----------------------------------------------------------------------------------------------------------------------------------------|
| ChIP-seq                   | Input_Control1            | 30.8                                 | GSE207116              | <a href="https://www.ncbi.nlm.nih.gov/geo/query/acc.cgi?acc=GSE207116">https://www.ncbi.nlm.nih.gov/geo/query/acc.cgi?acc=GSE207116</a> | this study                                                                                                                              |
| ChIP-seq                   | Input_NIPBL KD            | 33.6                                 | GSE207116              |                                                                                                                                         | this study                                                                                                                              |
| ChIP-seq                   | SMC1_Control1             | 53.2                                 | GSE207116              |                                                                                                                                         | this study                                                                                                                              |
| ChIP-seq                   | SMC1_NIPBL KD             | 23.6                                 | GSE207116              |                                                                                                                                         | this study                                                                                                                              |
| ChIP-seq                   | STAG1_Control1            | 25.6                                 | GSE207116              |                                                                                                                                         | this study                                                                                                                              |
| ChIP-seq                   | STAG1_NIPBL KD            | 24.8                                 | GSE207116              |                                                                                                                                         | this study                                                                                                                              |
| ChIP-seq                   | STAG2_Control1            | 34.8                                 | GSE207116              |                                                                                                                                         | this study                                                                                                                              |
| ChIP-seq                   | STAG2_NIPBL KD            | 25.0                                 | GSE207116              |                                                                                                                                         | this study                                                                                                                              |
| ChIP-seq                   | Input_Control2            | 42.6                                 | GSE207116              | <a href="https://www.ncbi.nlm.nih.gov/geo/query/acc.cgi?acc=GSE207116">https://www.ncbi.nlm.nih.gov/geo/query/acc.cgi?acc=GSE207116</a> | this study                                                                                                                              |
| ChIP-seq                   | Input_CTCF KD             | 21.9                                 | GSE207116              |                                                                                                                                         | this study                                                                                                                              |
| ChIP-seq                   | Input_CTCF&NIPBL KD       | 26.5                                 | GSE207116              |                                                                                                                                         | this study                                                                                                                              |
| ChIP-seq                   | STAG1_Control2            | 24.9                                 | GSE207116              |                                                                                                                                         | this study                                                                                                                              |
| ChIP-seq                   | STAG1_CTCF KD             | 35.9                                 | GSE207116              |                                                                                                                                         | this study                                                                                                                              |
| ChIP-seq                   | STAG1_CTCF&NIPBL KD       | 24.9                                 | GSE207116              |                                                                                                                                         | this study                                                                                                                              |
| ChIP-seq                   | STAG2_Control2            | 10.2                                 | GSE207116              |                                                                                                                                         | this study                                                                                                                              |
| ChIP-seq                   | STAG2_CTCF KD             | 27.5                                 | GSE207116              |                                                                                                                                         | this study                                                                                                                              |
| ChIP-seq                   | STAG2_CTCF&NIPBL KD       | 34.9                                 | GSE207116              |                                                                                                                                         | this study                                                                                                                              |
| ChIP-seq                   | Input_Control3            | 31.9                                 | GSE207116              |                                                                                                                                         | this study                                                                                                                              |
| ChIP-seq                   | Input_CTCF KD2            | 33.3                                 | GSE207116              |                                                                                                                                         | this study                                                                                                                              |
| ChIP-seq                   | CTCF_Control              | 19.7                                 | GSE207116              |                                                                                                                                         | this study                                                                                                                              |
| ChIP-seq                   | CTCF_CTCF KD              | 28.5                                 | GSE207116              |                                                                                                                                         | this study                                                                                                                              |
| ChIP-seq                   | STAG1_Control3            | 26.7                                 | GSE207116              |                                                                                                                                         | this study                                                                                                                              |
| ChIP-seq                   | STAG1_CTCF KD2            | 26.6                                 | GSE207116              |                                                                                                                                         | this study                                                                                                                              |
| ChIP-seq                   | Input                     |                                      | GSM2599090             |                                                                                                                                         | <a href="https://www.ncbi.nlm.nih.gov/geo/query/acc.cgi?acc=GSE98551">https://www.ncbi.nlm.nih.gov/geo/query/acc.cgi?acc=GSE98551</a>   |
| ChIP-seq                   | CTCF_R1                   |                                      | GSM2599084             | [6]                                                                                                                                     |                                                                                                                                         |
| ChIP-seq                   | CTCF_R2                   |                                      | GSM2599085             | [6]                                                                                                                                     |                                                                                                                                         |
| ChIP-seq                   | Input                     |                                      | GSM2718671             | <a href="https://www.ncbi.nlm.nih.gov/geo/query/acc.cgi?acc=GSE101921">https://www.ncbi.nlm.nih.gov/geo/query/acc.cgi?acc=GSE101921</a> | [7]                                                                                                                                     |
| ChIP-seq                   | STAG1                     |                                      | GSM2718667             |                                                                                                                                         | [7]                                                                                                                                     |
| ChIP-seq                   | STAG2                     |                                      | GSM2718668             |                                                                                                                                         | [7]                                                                                                                                     |
| ChIP-seq                   | SMC1A                     |                                      | GSM2718669             |                                                                                                                                         | [7]                                                                                                                                     |
| ChIP-seq                   | Input_control             |                                      | GSM2942299             | <a href="https://www.ncbi.nlm.nih.gov/geo/query/acc.cgi?acc=GSE101921">https://www.ncbi.nlm.nih.gov/geo/query/acc.cgi?acc=GSE101921</a> | [7]                                                                                                                                     |
| ChIP-seq                   | STAG1_control R1,R2       |                                      | GSM2942285, GSM2942286 |                                                                                                                                         | [7]                                                                                                                                     |
| ChIP-seq                   | STAG2_control R1,R2       |                                      | GSM2942287, GSM2942288 |                                                                                                                                         | [7]                                                                                                                                     |
| ChIP-seq                   | Input_STAG2 KD            |                                      | GSM2942297             |                                                                                                                                         | [7]                                                                                                                                     |
| ChIP-seq                   | STAG1_STAG2 KD R1,R2      |                                      | GSM2942293, GSM2942294 |                                                                                                                                         | [7]                                                                                                                                     |
| ChIP-seq                   | STAG2_STAG2 KD R1,R2      |                                      | GSM2942295, GSM2942296 |                                                                                                                                         | [7]                                                                                                                                     |
| Hi-C                       | control_R1                | 268.2                                | GSE207116              |                                                                                                                                         | <a href="https://www.ncbi.nlm.nih.gov/geo/query/acc.cgi?acc=GSE207116">https://www.ncbi.nlm.nih.gov/geo/query/acc.cgi?acc=GSE207116</a> |
| Hi-C                       | control_R2                | 365.1                                | GSE207116              | this study                                                                                                                              |                                                                                                                                         |
| Hi-C                       | control_R3                | 277.8                                | GSE207116              | this study                                                                                                                              |                                                                                                                                         |
| Hi-C                       | NIPBL KD_R1 (smartpool_2) | 291.3                                | GSE207116              | this study                                                                                                                              |                                                                                                                                         |
| Hi-C                       | NIPBL KD_R2 (oligo_1)     | 260.1                                | GSE207116              | this study                                                                                                                              |                                                                                                                                         |
| Hi-C                       | NIPBL KD_R3 (smartpool_1) | 193.8                                | GSE207116              | this study                                                                                                                              |                                                                                                                                         |
| Hi-C                       | NIPBL KD_R4 (oligo_2)     | 272.8                                | GSE207116              | this study                                                                                                                              |                                                                                                                                         |
| Hi-C                       | control, R1,R2            |                                      | GSM3110157, GSM3110158 | <a href="https://www.ncbi.nlm.nih.gov/geo/query/acc.cgi?acc=GSE101921">https://www.ncbi.nlm.nih.gov/geo/query/acc.cgi?acc=GSE101921</a> | [7]                                                                                                                                     |
| Hi-C                       | STAG2 KD R1,R2            |                                      | GSM3110161, GSM3110162 |                                                                                                                                         | [7]                                                                                                                                     |
| RNA-seq                    | Control (3 replicates)    | 25.4+31.9+31.8                       | GSE207116              | <a href="https://www.ncbi.nlm.nih.gov/geo/query/acc.cgi?acc=GSE207116">https://www.ncbi.nlm.nih.gov/geo/query/acc.cgi?acc=GSE207116</a> | this study                                                                                                                              |
| RNA-seq                    | NIPBL KD (3 replicates)   | 36.1+29.7+32,7                       | GSE207116              | <a href="https://www.ncbi.nlm.nih.gov/geo/query/acc.cgi?acc=GSE207116">https://www.ncbi.nlm.nih.gov/geo/query/acc.cgi?acc=GSE207116</a> | this study                                                                                                                              |
| RNA-seq                    | Control (3 replicates)    |                                      | GSM2718676-8           | <a href="https://www.ncbi.nlm.nih.gov/geo/query/acc.cgi?acc=GSE101921">https://www.ncbi.nlm.nih.gov/geo/query/acc.cgi?acc=GSE101921</a> | [7]                                                                                                                                     |
| RNA-seq                    | STAG2 KD (3 replicates)   |                                      | GSM2718682-4           | <a href="https://www.ncbi.nlm.nih.gov/geo/query/acc.cgi?acc=GSE101921">https://www.ncbi.nlm.nih.gov/geo/query/acc.cgi?acc=GSE101921</a> | [7]                                                                                                                                     |
| Espression profiling array | CdLS probands             |                                      | GSE12408               | <a href="https://www.ncbi.nlm.nih.gov/geo/query/acc.cgi?acc=GSE12408">https://www.ncbi.nlm.nih.gov/geo/query/acc.cgi?acc=GSE12408</a>   | [1]                                                                                                                                     |

**Supplementary Table 5. In situ Hi-C statistics (QC)**

| <b>Sample</b>             | <b>Reads (mill pairs)</b> | <b>Mappable, unique, high quality (%)</b> | <b>HiC contacts</b> | <b>%trans contacts</b> | <b>% cis short (&lt;20 kb)</b> | <b>% cis long (&gt;20 kb)</b> |
|---------------------------|---------------------------|-------------------------------------------|---------------------|------------------------|--------------------------------|-------------------------------|
| control_R1                | 310.4                     | 65                                        | 157,967,731         | 11.7                   | 28.4                           | 59.9                          |
| control_R2                | 388.8                     | 72.8                                      | 253,688,297         | 10.7                   | 28.8                           | 60.5                          |
| control_R3                | 305.6                     | 70.4                                      | 180,027,808         | 11.6                   | 28.4                           | 60.0                          |
| <b>Control_merge</b>      | <b>1004.8</b>             |                                           |                     |                        |                                |                               |
| NIPBL KD_R1 (smartpool_2) | 309.9                     | 72.5                                      | 200,394,043         | 14.3                   | 29.3                           | 56.5                          |
| NIPBL KD_R2 (oligo_1)     | 277.0                     | 73.2                                      | 179,769,165         | 13.7                   | 29.1                           | 57.1                          |
| NIPBL KD_R3 (smartpool_1) | 206.8                     | 71.9                                      | 134,240,661         | 14.3                   | 28.4                           | 57.3                          |
| NIPBL KD_R4 (oligo_2)     | 309.0                     | 68.3                                      | 166,116,268         | 14.0                   | 30.2                           | 57.7                          |
| <b>NIPBL KD_merge</b>     | <b>1102.7</b>             |                                           |                     |                        |                                |                               |

**Supplementary Table 6. Oligonucleotides**

| <b>TYPE</b> | <b>NAME</b>                    | <b>SOURCE</b> | <b>SEQUENCE (or CAT#)</b>       |
|-------------|--------------------------------|---------------|---------------------------------|
| siRNA       | hNIPBL custom                  | Dharmacon     | 5'-CUGAUAACUAGAACGAAA-3'        |
| siRNA       | hNIPBL ON-TARGETplus SMARTpool | Dharmacon     | L-012980-00                     |
| siRNA       | hSTAG1 ON-TARGETplus SMARTpool | Dharmacon     | L-010638-01                     |
| siRNA       | hSTAG2 ON-TARGETplus SMARTpool | Dharmacon     | L-021351-00                     |
| siRNA       | hSMC1A ON-TARGETplus SMARTpool | Dharmacon     | L-006833-00                     |
| siRNA       | hCTCF ON-TARGETplus SMARTpool  | Dharmacon     | L-020165-00                     |
| siRNA       | hESCO1 siGENOME SMARTpool      | Dharmacon     | M-023413-01                     |
| siRNA       | hWAPL custom siRNA             | Dharmacon     | 5'-CGGACUACCCUUAGCACAA-3'       |
| DNA         | gSTAG1 fw                      | IDT           | 5'-CACCGGATCGATTCAATCATTCTG-3'  |
| DNA         | gSTAG1 rev                     | IDT           | 5'-AAACCAGAATGATTGAATCGATCC-3'  |
| DNA         | gSTAG2 fw                      | IDT           | 5'-CACCGATTTGACATACAAGCACCC-3'  |
| DNA         | gSTAG2 rev                     | IDT           | 5'-AAACGGGTGCTTGTATGTCGAAATC-3' |
| DNA         | hNIPBL fw                      | IDT           | 5'-ACAGGCATGACAATAGGAGGGATTG-3' |
| DNA         | hNIPBL rev                     | IDT           | 5'-ATCGCCCATCAGGTCTCTGC-3'      |
| DNA         | hSTAG1 fw                      | IDT           | 5'-CCTGGGAGTCTGACAAACCCG-3'     |
| DNA         | hSTAG1 rev                     | IDT           | 5'-TCCTCTTACCATGCCTGGACC-3'     |
| DNA         | hSTAG2 fw                      | IDT           | 5'-AGCTGGTGGTGATGATGACA-3'      |
| DNA         | hSTAG2 rev                     | IDT           | 5'-CATAACAGGGGTGTGCAGTG-3'      |
| DNA         | hCTCF fw                       | IDT           | 5'-TCACCCTCCTGAGGAATCCAC-3'     |
| DNA         | hCTCF rev                      | IDT           | 5'-CGTAATCGCACATGGAACAC-3'      |
| DNA         | hESCO1 fw                      | IDT           | 5'-ACAGCATCTGCTTTTCCACA-3'      |
| DNA         | hESCO1 rev                     | IDT           | 5'-CCTGCCATCAGGGTATTGAG-3'      |
| DNA         | hWAPL fw                       | IDT           | 5'-AGCCTCTGCCTACCAGAATG-3'      |
| DNA         | hWAPL rev                      | IDT           | 5'-TGTGCCTATGAGACCGTCCTG-3'     |
| DNA         | hGAPDH fw                      | IDT           | 5'-TGCACCACCAACTGCTTAGC-3'      |
| DNA         | hGAPDH                         | IDT           | 5'-GAGGGGCCATCCACAGTCTTC-3'     |

**Supplementary Table 7. Antibodies**

| Target                     | Host               | Source or Reference#                               | Immunogen                                  | Application**/Dilution                                            |
|----------------------------|--------------------|----------------------------------------------------|--------------------------------------------|-------------------------------------------------------------------|
| NIPBL                      | Rabbit polyclonal* | Custom made, this study                            | recombinant fragment: mNIPBL aa2349-2667   | FC: 4 µg/ml; WB: 5 µg/ml                                          |
| MAU2                       | Rabbit monoclonal  | Clone EPR14390, Abcam, ab183033                    | Recombinant fragment, undisclosed          | WB: 1:1000                                                        |
| STAG1                      | Rat monoclonal     | Custom made, clone SUSI 63B, ref [7]               | recombinant fragment: mSTAG1 aa1-225       | WB: 1:10                                                          |
| STAG1                      | Rabbit polyclonal* | Custom made, ref [8]                               | CEEDSGFGMPMF                               | FC: 4 µg/ml; WB: 2 µg/ml; IF: 1 µg/ml<br>ChIP: 50 µg/ 10e7 cells  |
| STAG2                      | Rabbit polyclonal* | Custom made, ref [8]                               | CDPASIMDESVLGVSMF                          | ChIP: 50 µg/ 10e7 cells                                           |
| STAG2                      | Mouse monoclonal   | Clone J-12, SCBT, SC-81852                         | recombinant protein with epitope at C-term | FC: 2 µg/ml; WB: 0.4 µg/ml; IF: 1 µg/ ml                          |
| SMC1A                      | Rabbit polyclonal* | Custom made, ref [9]                               | CDLTKYPDANPNPNEQ                           | FC: 4 µg/ml; WB: 1 µg/ml; IF: 1 µg/ ml<br>ChIP: 50 µg/ 10e7 cells |
| CTCF                       | Rabbit polyclonal  | Millipore 07-729 RRID:AB_441965                    | TNQPKNQPTAIQVED aa659-675 of hCTCF         | ChIP: 15 µg/10e7 cells                                            |
| CTCF                       | Rat monoclonal     | Custom made, clone MARS159A/D1, this study         | recombinant fragment: hCTCF aa574-727      | WB: Undiluted supernatant                                         |
| ESCO1                      | Mouse monoclonal   | Custom made, ref [10], kind gift from K. Shirahige | CEEKLPVIRSEEEKVRFERQKA                     | WB: 1:200                                                         |
| WAPL                       | Rat monoclonal     | Custom made, clone WAPI 432E/E9, ref [13]          | recombinant fragment: hWAPL aa838-1190     | WB: Undiluted supernatant                                         |
| ORC2                       | Rabbit polyclonal  | Custom made, ref [11], kind gift from J. Méndez    | GST-hOrc2                                  | WB: 1:1000                                                        |
| MCM3                       | Rabbit polyclonal  | Custom made, ref [12], kind gift from J. Méndez    | hMcm3, aa 674 -693                         | FC: 1:100; WB: 1:1000                                             |
| MEK2                       | Mouse monoclonal   | Clone 96/MEK2 (RUO), BD Bioscience AB_397631       | recombinant fragment, Rat MEK2 1-110aa     | WB: 1:1000                                                        |
| Cy3 AffiniPure             | Rabbit polyclonal  | Jackson ImmunoResearch: AB_2307443                 | IgG (H+L)                                  | FC: 1:400                                                         |
| Alexa Fluor 488 AffiniPure | Mouse polyclonal   | Jackson ImmunoResearch: AB_2340846                 | IgG (H+L)                                  | FC: 1:400                                                         |

\* All custom made Rabbit polyclonal antibodies are affinity purified, except those for ORC2 and MCM3

\*\*FC, Flow Cytometry; WB, Western Blot; IF, Immunofluorescence; ChIP, Chromatin Immunoprecipitation



## Supplementary References

1. Liu, J. *et al.* Transcriptional dysregulation in NIPBL and cohesin mutant human cells. *PLoS Biol* **7**, e1000119 (2009).
2. Haarhuis, J. H. I. *et al.* The Cohesin Release Factor WAPL Restricts Chromatin Loop Extension. *Cell* **169**, 693–707 (2017).
3. Luna-Peláez, N. *et al.* The Cornelia de Lange Syndrome-associated factor NIPBL interacts with BRD4 ET domain for transcription control of a common set of genes. *Cell Death Dis.* **10**, 548 (2019).
4. Schwarzer, W. *et al.* Two independent modes of chromatin organization revealed by cohesin removal. *Nature* **551**, 51–56 (2017).
5. Kawauchi, S. *et al.* Multiple organ system defects and transcriptional dysregulation in the Nipbl(+/-) mouse, a model of Cornelia de Lange Syndrome. *PLoS Genet* **5**, e1000650 (2009).
6. Fritz, A. J. *et al.* Intranuclear and higher-order chromatin organization of the major histone gene cluster in breast cancer. *J. Cell. Physiol.* **233**, 1278–1290 (2018).
7. Kojic, A. *et al.* Distinct roles of cohesin-SA1 and cohesin-SA2 in 3D chromosome organization. *Nat. Struct. Mol. Biol.* **25**, 496–504 (2018).
8. Remeseiro, S. *et al.* Cohesin-SA1 deficiency drives aneuploidy and tumorigenesis in mice due to impaired replication of telomeres. *EMBO J* **31**, 2076–2089 (2012).
9. Remeseiro, S., Cuadrado, A., Gómez-López, G., Pisano, D. G. & Losada, A. A unique role of cohesin-SA1 in gene regulation and development. *EMBO J* **31**, 2090–2102 (2012).
10. Minamino, M. *et al.* Esco1 Acetylates Cohesin via a Mechanism Different from That of Esco2. *Curr Biol* **25**, 1694–1706 (2015).
11. Gavin, K. A., Hidaka, M. & Stillman, B. Conserved initiator proteins in eukaryotes. *Science (80-. )*. **270**, 1667–1671 (1995).
12. Mendez, J. & Stillman, B. Chromatin association of human origin recognition complex, cdc6, and minichromosome maintenance proteins during the cell cycle: assembly of prereplication complexes in late mitosis. *Mol Cell Biol* **20**, 8602–8612 (2000).
13. Morales, C. *et al.* PDS5 proteins are required for proper cohesin dynamics and participate in replication fork protection. *J. Biol. Chem.* **2895**, 146–157 (2020).
